# Supplementary material
Source: PubMed Central journal article supplement (PMC4351349)
Supplement: supp_kwu293_kwu293supp.pdf [file supp_kwu293_kwu293supp.pdf]

## **Supplemental Web Material**

Associations of cadmium and lead exposure with leukocyte telomere length: Findings from NHANES 1999-2002

Ami R. Zota, Belinda L. Needham, Elizabeth H. Blackburn, Jue Lin, Sung Kyun Park, David H. Rehkopf, and Elissa S. Epel

Corresponding author: Ami R. Zota, ScD, MS, Department of Environmental and Occupational Health, Milken Institute School of Public Health, The George Washington University, 950 New Hampshire Avenue NW, Suite 414, Washington DC 20052

Email: [azota@gwu.edu](mailto:azota@gwu.edu); Phone: 202.994.9289

Web Table 1. Percent Difference (95% CI) in LTL (T/S ratio) by Blood Lead and Cadmium, NHANES 1999-2002 (N=6,796).<sup>a</sup>

|                                           | Blood lead (µg/dL)    |                       |                       | Blood cadmium (µg/L)  |                       |
|-------------------------------------------|-----------------------|-----------------------|-----------------------|-----------------------|-----------------------|
|                                           | Model 1               | Model 2               | Model 3               | Model 4               | Model 5               |
| Per doubling of exposure                  | --                    | -0.07 (-1.38, 1.26)   |                       | -2.46 (-3.74, -1.17)* |                       |
| Quartile (Quartile 1 = ref)               |                       |                       |                       |                       |                       |
| Quartile 2                                | --                    | --                    | 1.41 (-0.40, 3.25)    | --                    | -4.59 (-7.13, -1.98)* |
| Quartile 3                                | --                    | --                    | 0.70 (-1.09, 2.53)    | --                    | -5.35 (-8.33, -2.37)* |
| Quartile 4                                | --                    | --                    | 0.20 (-2.37, 2.74)    | --                    | -5.54 (-8.70, -2.37)* |
| <i>P for Trend</i>                        |                       |                       | 0.90                  |                       | 0.001                 |
| Age                                       | -0.60 (-0.60, -0.50)* | -0.60 (-0.70, -0.50)* | -0.60 (-0.70, -0.50)* | -0.60 (-0.60, -0.50)* | -0.50 (-0.60, -0.50)* |
| Age squared                               | 0.00 (0.00, 0.00)     | 0.00 (0.00, 0.00)     | 0.00 (0.00, 0.00)     | 0.00 (0.00, 0.00)     | 0.00 (0.00, 0.00)     |
| Female                                    | 1.61 (-0.10, 3.46)    | 1.61 (-0.60, 3.87)    | 1.61 (-0.50, 3.77)    | 2.53 (0.60, 4.50)*    | 2.43 (0.50, 4.39)*    |
| Race/ethnicity (non-Hispanic white = ref) |                       |                       |                       |                       |                       |
| Non-Hispanic black                        | 5.55 (1.92, 9.20)*    | 5.55 (1.92, 9.20)*    | 5.55 (2.02, 9.20)*    | 5.34 (1.92, 8.87)*    | 5.44 (2.02, 8.87)*    |
| Mexican American                          | -3.92 (-7.87, 0.30)   | -3.92 (-7.87, 0.30)   | -3.82 (-7.87, 0.30)   | -3.54 (-7.32, 0.40)   | -3.34 (-7.13, 0.60)   |
| Other Hispanic                            | 5.13 (-3.44, 14.57)   | 5.13 (-3.34, 14.45)   | 5.13 (-3.44, 14.45)   | 5.13 (-3.34, 14.34)   | 5.34 (-3.05, 14.57)   |
| Other                                     | -0.10 (-4.88, 4.92)   | 0.10 (-4.88, 4.92)    | -0.10 (-4.88, 4.92)   | 0.80 (-3.82, 5.76)    | 0.90 (-3.73, 5.87)    |
| Education (< high school diploma = ref)   |                       |                       |                       |                       |                       |
| High school                               | -3.25 (-5.73, -0.70)* | -3.15 (-5.73, -0.60)* | -3.15 (-5.73, -0.60)* | -2.96 (-5.45, -0.50)* | -2.96 (-5.45, -0.50)* |
| Some college                              | -1.98 (-4.59, 0.70)   | -1.98 (-4.59, 0.70)   | -1.98 (-4.59, 0.70)   | -1.98 (-4.50, 0.70)   | -1.88 (-4.40, 0.70)   |
| College degree                            | -1.59 (-4.21, 1.11)   | -1.59 (-4.21, 1.11)   | -1.59 (-4.11, 1.11)   | -1.49 (-4.02, 1.01)   | -1.49 (-3.92, 1.11)   |
| Smoking, pack years (0 =ref)              |                       |                       |                       |                       |                       |
| <30                                       | 0.30 (-1.29, 1.82)    | 0.30 (-1.39, 1.92)    | 0.20 (-1.39, 1.82)    | 1.21 (-0.40, 2.84)    | 1.21 (-0.40, 2.84)    |
| 30-59                                     | -2.27 (-4.97, 0.50)   | -2.27 (-4.97, 0.50)   | -2.18 (-4.88, 0.50)   | -0.70 (-3.63, 2.43)   | -1.29 (-4.21, 1.82)   |
| ≥60                                       | -2.86 (-6.57, 1.11)   | -2.76 (-6.57, 1.11)   | -2.66 (-6.39, 1.21)   | -1.39 (-5.35, 2.84)   | -1.88 (-6.01, 2.43)   |
| BMI (mg/kg <sup>2</sup> )                 | -0.20 (-0.30, -0.10)* | -0.20 (-0.30, -0.10)* | -0.20 (-0.30, -0.10)* | -0.20 (-0.40, -0.10)* | -0.20 (-0.40, -0.10)* |
| cotinine (ng/mL)                          | -0.30 (-0.50, -0.03)* | -0.30 (-0.50, 0.00)*  | -0.3 (-0.50, 0.00)*   | 0.10 (-0.20, 0.40)    | -0.10 (-0.30, 0.20)   |
| Model R <sup>2</sup>                      | 0.18                  | 0.18                  | 0.18                  | 0.19                  | 0.19                  |

Abbreviation: BMI, body mass index; LTL, leukocyte telomere length

\*P < 0.05

<sup>a</sup> Regression coefficients rounded to three significant digits.

Web Table 2. Percent Difference (95% CI) in LTL (T/S ratio) by Urine Cadmium, NHANES 1999-2002 (N=2,093).<sup>a</sup>

|                                           | Urine cadmium (µg/L)   |                       |                       |
|-------------------------------------------|------------------------|-----------------------|-----------------------|
|                                           | Model 1                | Model 2               | Model 3               |
| Per doubling of exposure                  | --                     | -1.10 (-2.26, 0.07)   | --                    |
| Quartile (Quartile 1 = ref)               |                        |                       |                       |
| Quartile 2                                | --                     | --                    | -1.09 (-4.97, 2.94)   |
| Quartile 3                                | --                     | --                    | -4.59 (-8.97, 0.20)   |
| Quartile 4                                | --                     | --                    | -4.50 (-8.79, -0.20)* |
| <i>P for Trend</i>                        |                        |                       | 0.02                  |
| Age                                       | -0.50 (-0.70, -0.40)*  | -0.50 (-0.60, -0.40)* | -0.50 (-0.60, -0.30)* |
| Age squared                               | 0.00 (0.00, 0.00)      | 0.00 (0.00, 0.00)     | 0.00 (0.00, 0.00)     |
| Female                                    | 1.51 (-0.80, 3.87)     | 2.22 (-0.30, 4.81)    | 2.43 (0.10, 4.92)*    |
| Race/ethnicity (Non-Hispanic white = ref) |                        |                       |                       |
| Non-Hispanic black                        | 7.57 (3.67, 11.63)*    | 7.68 (3.77, 11.63)*   | 7.68 (3.87, 11.63)*   |
| Mexican American                          | -2.76 (-6.57, 1.21)    | -2.47 (-6.39, 1.51)   | -2.37 (-6.20, 1.71)   |
| Other Hispanic                            | 11.29 (2.02, 21.41)*   | 11.63 (2.22, 22.02)*  | 11.63 (2.33, 21.77)*  |
| Other                                     | -1.00 (-7.69, 6.29)    | -0.4 (-7.13, 6.82)    | -0.20 (-7.13, 7.25)   |
| Education (college degree= ref)           |                        |                       |                       |
| < High school                             | -5.16 (-8.06, -2.18)*  | -4.97 (-7.78, -2.08)* | -4.97 (-7.87, -1.98)* |
| High school                               | -0.70 (-4.40, 3.15)    | -0.50 (-4.21, 3.36)   | -0.60 (-4.40, 3.36)   |
| Some college                              | -3.05 (-6.48, 0.60)    | -2.86 (-6.29, 0.70)   | -2.86 (-6.29, 0.70)   |
| Smoking, pack years (0 =ref)              |                        |                       |                       |
| <30                                       | -3.63 (-6.11, -1.00)*  | -3.25 (-5.73, -0.60)* | -3.05 (-5.64, -0.39)* |
| 30-59                                     | -5.64 (-9.61, -1.49)*  | -4.78 (-8.97, -0.30)* | -4.69 (-8.88, -0.34)* |
| ≥60                                       | -7.69 (-14.62, -0.20)* | -6.57 (-13.93, 1.21)  | -6.29 (-13.93, 1.61)  |
| BMI (mg/kg <sup>2</sup> )                 | -0.20 (-0.40, 0.01)    | -0.20 (-0.40, -0.01)* | -0.20 (-0.50, -0.00)* |
| cotinine (ng/mL)                          | -0.10 (-0.50, 0.20)    | -0.10 (-0.40, 0.30)   | -0.04 (-0.40, 0.30)   |
| creatinine (mg/dl)                        | -1.29 (-2.96, 0.40)    | 0.10 (-2.27, 2.43)    | 0.30 (-2.27, 3.05)    |
| Model R <sup>2</sup>                      | 0.19                   | 0.19                  | 0.20                  |

Abbreviation: BMI, body mass index; LTL, leukocyte telomere length

\*P < 0.05

<sup>a</sup>Regression coefficients rounded to three significant digits.

Web Table 3. Estimation of natural direct association, natural indirect association, and total association of smoking on LTL (T/S Ratio) (N = 6,796).<sup>a</sup>

|                              | Estimate (95% CI)       | P value |
|------------------------------|-------------------------|---------|
| Natural direct association   | -0.016 (-0.034, 0.001)  | 0.07    |
| Natural indirect association | -0.015 (-0.021, -0.010) | <0.0001 |
| Total association            | -0.032 (-0.049, -0.015) | 0.0002  |

Abbreviation: LTL, leukocyte telomere length

<sup>a</sup>Exposure = smoking history (< 30 pack years versus  $\geq$  30 pack years of smoking), Mediator = blood cadmium levels (natural log transformed), Outcome = LTL (natural log transformed). Models adjusted for age, age squared, sex, race/ethnicity, educational attainment, and body mass index.

Web Table 4. Percent Difference (95% CI) in LTL (T/S ratio) by Cumulative Smoking History and Serum Cotinine (N=6,796)<sup>a</sup>

|                               | Model                 | Model 2               | Model 3               |
|-------------------------------|-----------------------|-----------------------|-----------------------|
| Smoking, pack years (0 = ref) |                       |                       |                       |
| <30                           | -0.60 (-1.88, 0.60)   |                       | 0.30 (-1.29, 1.82)    |
| 30-59                         | -3.44 (-6.20, -0.60)* |                       | -2.27 (-4.97, 0.50)   |
| ≥ 60                          | -3.82 (-7.69, 0.20)   |                       | -2.86 (-6.57, 1.11)   |
| <i>P for Trend</i>            | 0.009                 |                       | 0.09                  |
| cotinine (ng/mL)              |                       |                       |                       |
|                               |                       | -0.30 (-0.50, -0.10)* | -0.30 (-0.50, -0.03)* |

\*P < 0.05

<sup>a</sup>Models adjusted for age, age squared, sex, race/ethnicity, educational attainment, and body mass index.
